# Supplementary material for: Soil temperatures and active carbon components as key drivers of C stock dynamics between two different stand ages of Larix principis-rupprechtii plantation
Source: PeerJ. 2020 Jan 21;8:e8384. doi: 10.7717/peerj.8384 (PMC6979437; doi:10.7717/peerj.8384)
Supplement: Supplemental Information 1 [file peerj-08-8384-s001.xlsx]

## Sheet: Identifier information
Identifier	Treatment	Repet	Soil layer	Plantation
1G1-1	24 years old forest	Repeated plot-1	0-10cm soil layer	Larix principis-rupprechtii plantation
1G1-2			10-20 cm soil layer
1G1-3			20-30 cm soil layer
1G1-4			30-40 cm soil layer
1G1-5			40-50 cm soil layer
1G2-1		Repeated plot-2	0-10cm soil layer
1G2-2			10-20 cm soil layer
1G2-3			20-30 cm soil layer
1G2-4
1G2-5			40-50 cm soil layer
1G3-1		Repeated plot-3	0-10cm soil layer
1G3-2			10-20 cm soil layer
1G3-3			20-30 cm soil layer
1G3-4			30-40 cm soil layer
1G3-5			40-50 cm soil layer
2G1-1	40 years old forest	Repeated plot-1	0-10cm soil layer	Larix principis-rupprechtii plantation
2G1-2			10-20 cm soil layer
2G1-3			20-30 cm soil layer
2G1-4			30-40 cm soil layer
2G1-5			40-50 cm soil layer
2G2-1		Repeated plot-2	0-10cm soil layer
2G2-2			10-20 cm soil layer
2G2-3			20-30 cm soil layer
2G2-4			30-40 cm soil layer
2G2-5			40-50 cm soil layer
2G3-1		Repeated plot-3	0-10cm soil layer
2G3-2			10-20 cm soil layer
2G3-3			20-30 cm soil layer
2G3-4			30-40 cm soil layer
2G3-5			40-50 cm soil layer

## Sheet: Raw Data
year of 2016		Moisture	pH	N(g kg-1)	C(g kg-1)	SOC/STN	DOC(mg kg-1)	DON(mg N kg-1)	DOC/DON	MBC(mg kg-1)	MBN(mg N kg-1)	MBC/MBN		year of 2017		Moisture	pH	N(g kg-1)	C(g kg-1)	SOC/STN	DOC(mg kg-1)	DON(mg N kg-1)	DOC/DON	MBC(mg kg-1)	MBN(mg N kg-1)	MBC/MBN				Moisture	pH	N(g kg-1)	C(g kg-1)	SOC/STN	DOC(mg kg-1)	DON(mg N kg-1)	DOC/DON	MBC(mg kg-1)	MBN(mg N kg-1)	MBC/MBN				Moisture	pH	N(g kg-1)	C(g kg-1)	SOC/STN	DOC(mg kg-1)
2016-08-01	1G1-1	39.6	6.101	2.50698	37.3973	14.9172	65.0904	54.0148	1.20505	584.5	39.6	14.8		2017-04-01	1G1-1	47.1327	6.1	6.62403	22.8114	3.44373	213.284	46.6705	4.56999	197.6	40.2	4.9		2017-06-01	1G1-1	42.9544	5.81	2.57818	32.1032	12.4519	74.2791	55.3234	1.34264	202.2	18.5	10.9			1G1-1	37.037	6.1	3.77883	50.5312	13.3722	59.0904
	1G1-2	22.4	6.616	1.39591	22.6302	16.2117	61.3914	50.4432	1.21704	576.5	22.4	25.8			1G1-2	43.8139	5.91	5.69947	19.6263	3.44353	173.727	38.3695	4.52774	212.8	23.4	9.1			1G1-2	33.4029	5.99	1.75375	21.893	12.4835	50.3729	47.3047	1.06486	163.3	8.4	19.6		2017-08-01	1G1-2	29.7297	6.58	1.87672	25.1732	13.4134	46.3914
	1G1-3	18.3	6.619	1.27746	10.5184	8.23388	37.23	45.8249	0.81244	550.2	18.3	30.1			1G1-3	41.2523	6.14	3.94556	17.4801	4.43031	172.384	40.4547	4.26117	172.3	15.7	11			1G1-3	32.144	6.42	1.16568	16.3741	14.0468	40.0132	46.5147	0.860227	187.2	4.8	38.6			1G1-3	30.2583	6.88	2.01207	26.4207	13.1311	29.23
	1G1-4	13.9	6.645	1.27838	10.3262	8.07756	36.2409	45.6318	0.794203	436.3	13.9	31.3			1G1-4	41.4733	6.205	1.56618	13.5825		130.505	43.1563	3.02402	170	17	10			1G1-4	31.1787	6.2	0.542645	8.8389	16.2886	39.1326	40.919	0.956343	104.7	7.7	13.6			1G1-4	30.3834	6.64	2.04513	27.2203	13.3098	28.7409
	1G1-5	19.6	6.9175	1.2208	9.14092	7.48766	28.3107	44.0375	0.642876	431.4	19.6	22			1G1-5	39.7533	6.3125	1.45729	12.5089	8.58365	110.056	41.9661	2.62249	156.4	14.2	11			1G1-5	29.7734	6.505	0.641541	9.87686	15.3955	24.1931	39.1118	0.618561	99	8.5	11.6			1G1-5	29.994	7.03	1.92506	26.2448	13.6332	24.8107
	1G2-1	36	6.308	1.55998	17.6102	11.2887	46.5451	63.2198	0.736242	581.7	36	16.2			1G2-1	45.3788	6.07	6.18161	22.245	3.59858	144.972	44.1952	3.28026	253.4	46.4	5.5			1G2-1	39.508	5.88	2.23332	27.369	12.2549	70.3678	57.8679	1.21601	242	9.1	26.5			1G2-1	34.1204	6.07	1.95852	28.1447	14.3704	31.5451
	1G2-2	21.4	6.515	1.26452	32.3124	25.5531	42.9019	48.5366	0.883908	571.8	21.4	26.8			1G2-2	35.9028	6.21	6.38254	19.484	3.0527	127.477	29.1919	4.36685	236.9	37.7	6.3			1G2-2	33.674	6.09	1.62603	20.5548	12.6411	42.6153	48.5504	0.877753	218.8	8.7	25.3			1G2-2	35.1394	6.21	1.48351	21.6508	14.5943	27.9019
	1G2-3	14.6	6.65	2.24913	20.0914	8.93295	37.6365	44.5469	0.844874	504.8	14.6	34.7			1G2-3	31.7229	6.44	3.56415	15.8183	4.43818	124.083	25.1854	4.92678	185.2	10.7	17.3			1G2-3	26.6397	6.55	1.09751	15.3884	14.0212	28.9245	45.8436	0.630939	228.5	8.2	28			1G2-3	33.9651	6.44	0.959594	16.4643	17.1576	32.6365
	1G2-4	9.1	6.82775	1.71056	22.4841	13.1443	26.7235	51.3287	0.520634	501.2	9.1	54.9			1G2-4	32.6408	6.544	1.13077	15.3735	13.5955	110.224	24.6903	4.46428	179.3	17.6	10.2			1G2-4	30.591	6.285	0.705929	10.2628	14.538	31.4916	41.8557	0.752383	105.2	7.2	14.7			1G2-4	29.413	6.44	0.904903	16.2034	17.9063	26.7235
	1G2-5	7.8	6.97795	1.22809	36.1678	29.4505	22.2692	47.1205	0.472601	557.1	7.8	71.3			1G2-5	30.0081	6.6125	0.911988	14.9328	16.3739	112.178	31.1941	3.59613	158.1	11.6	13.6			1G2-5	27.1569	6.62	0.838351	13.6978	16.3389	22.7699	40.2031	0.566372	89	6.2	14.5			1G2-5	28.5523	6.625	0.59589	12.0904	20.2897	17.2692
	1G3-1	39	6.2475	1.09634	51.2685	46.7634	63.0301	58.0711	1.0854	543.2	39	13.9			1G3-1	43.2184	6.11	5.37504	28.3577	5.27582	140.927	40.5022	3.47949	293.4	42.8	6.9			1G3-1	42.2082	5.9	2.26928	28.2667	12.4563	53.7547	53.3565	1.00746	297.1	22.5	13.2			1G3-1	38.3275	6.11	3.97657	50.5709	12.7172	61.0301
	1G3-2	27.1	6.6665	1.85214	21.8828	11.8149	37.9785	47.2328	0.804069	609.9	27.1	22.5			1G3-2	45.5011	6.42	4.14305	24.2746	5.8591	136.946	28.2854	4.84156	176.9	43.4	4.1			1G3-2	33.3333	6.19	1.86228	23.4718	12.6038	40.4267	47.36	0.853604	222.5	12	18.5			1G3-2	34.5806	6.62	1.48351	21.6508	14.5943	31.9785
	1G3-3	22.1	6.87	1.73184	19.1184	11.0394	33.5227	45.3438	0.739301	519.1	22.1	23.5			1G3-3	40.9057	6.66	7.11413	18.1577	2.55235	107.652	26.9975	3.98747	261	15.1	17.2			1G3-3	29.3307	6.54	1.04379	15.6775	15.0198	58.1471	45.0847	1.28973	141.2	5.8	24.4			1G3-3	28.7779	6.66	0.959594	16.4643	17.1576	19.5227
	1G3-4	9.2	6.982	1.4847	14.7072	9.90587	26.5043	43.2232	0.613196	492.2	9.2	53.8			1G3-4	40.3598	6.5965	1.01948	14.2	13.9287	115.494	23.7499	4.86292	207.2	17.9	11.5			1G3-4	28.7708	6.345	0.607244	9.69287	15.9621	34.0907	49.2121	0.69273	79.2	9.1	8.7			1G3-4	31.4541	6.665	0.904903	16.2034	17.9063	13.5043
	1G3-5	7.8	7.00125	1.24311	10.7705	8.66416	27.7506	44.9246	0.617715	478	7.8	61			1G3-5	39.2034	6.814	0.90195	10.8364	12.0144	109.13	31.1018	3.5088	177.1	14.7	12.1			1G3-5	26.332	6.665	0.577055	8.90232	15.4271	29.2869	44.2903	0.661248	90.8	8.6	10.6			1G3-5	28.6793	6.94	0.59589	12.0904	20.2897	12.7506
	2G1-1	20.7	6.69	1.30251	11.7086	8.98932	50.6285	46.734	1.08333	566.4	20.7	27.3			2G1-1	41.1895	6.69	1.50415	18.9747	12.6149	139.1	37.4435	3.71493	466.6	29.5	15.8			2G1-1	31.1663	6.38	1.72553	22.9348	13.2914	49.1611	49.7383	0.988397	233.2	9.9	23.5			2G1-1	30.7039	6.69	2.13732	27.2133	12.7324	47.6285
	2G1-2	12.1	6.73	1.71038	19.3579	11.3179	30.3225	44.128	0.687149	550.6	12.1	45.7			2G1-2	36.5747	6.96	1.01842	15.6549	15.3717	84.5125	24.9112	3.39254	549.9	20.6	26.6			2G1-2	34.3792	6.86	1.56188	19.2192	12.3052	41.8188	49.3709	0.847033	224.3	8.8	25.6			2G1-2	27.6873	6.96	1.41693	18.6929	13.1926	15.3225
	2G1-3	13.8	6.86	1.63478	17.4687	10.6857	31.7903	43.2456	0.735112	433.2	13.8	31.5			2G1-3	36.8362	7.05	0.994429	15.5414	15.6285	99.8357	25.561	3.90578	350.4	14.2	24.7			2G1-3	31.2053	7.11	1.34987	16.9546	12.5602	14.59	45.397	0.321387	183.3	5.8	31.7			2G1-3	27.5862	7.05	1.0092	14.5904	14.4574	16.7903
	2G1-4	15.5	7.17725	1.35541	12.7424	9.40113	23.4755	38.4627	0.610344	404.8	15.5	26.1			2G1-4	35.8821	7.3425	0.794239	11.5217	14.5066	87.8062	21.5022	4.08358	343.5	10.8	31.7			2G1-4	27.7727	7.12	1.00622	10.301	10.2373	21.49	44.5676	0.482188	199.2	6.3	31.7			2G1-4	28.1956	7.325	0.529371	10.2275	19.3202	18.4755
	2G1-5	7.2	7.28875	1.25958	11.5751	9.18958	15.9436	38.1321	0.418114	417.7	7.2	57.8			2G1-5	33.7055	7.5205	1.01456	10.3504	10.2019	68.1374	28.1067	2.42424	336.7	9.4	35.9			2G1-5	25.7922	7.485	1.43297	11.1257	7.76406	15.2044	38.4693	0.395235	188.8	6.2	30.5			2G1-5	27.6368	7.505	0.769528	12.8999	16.7634	16.9436
	2G2-1	24.6	6.679	1.80008	20.6809	11.4889	43.9618	45.1344	0.97402	600.5	24.6	24.4			2G2-1	41.3005	6.8	1.15009	12.5727	10.9319	124.005	40.1859	3.08579	481.2	27.7	17.3			2G2-1	35.0247	6.83	1.94608	22.0368	11.3237	51.5794	51.4984	1.00157	226.2	13.4	16.9			2G2-1	28.8336	6.8	2.13732	27.2133	12.7324	28.9618
	2G2-2	18.8	6.549	1.42871	14.5767	10.2027	30.4525	37.139	0.819961	570.6	18.8	30.3			2G2-2	34.366	6.77	0.446499	15.6549	35.0614	99.1621	23.0572	4.3007	494.7	16.9	29.2			2G2-2	30.9342	7.22	1.70696	16.129	9.44896	31.8956	45.3818	0.702827	273.6	10.5	26			2G2-2	27.9182	6.77	0.665789	11.2133	16.8422	15.4525
	2G2-3	17.8	6.894	1.29687	11.7451	9.05652	20.8715	37.9644	0.549766	534.5	17.8	30			2G2-3	31.9983	6.97	0.150157	14.6549	97.5971	76.6118	18.691	4.09887	327.8	12.7	25.8			2G2-3	30.8115	7.32	1.49217	14.3657	9.62737	18.2613	45.784	0.398857	143.9	8.2	17.5			2G2-3	27.6423	6.97	0.33271	7.98849	24.0104	5.87154
	2G2-4	13.9	7.18975	1.28218	11.5822	9.03316	16.7929	45.2455	0.37115	507.5	13.9	36.6			2G2-4	30.8333	7.2185	0.815229	11.8192	14.498	78.1584	19.4384	4.02082	389.5	9.2	42.3			2G2-4	27.9795	7.525	1.36405	12.0563	8.8386	17.7375	40.6412	0.436441	170	9.2	18.5			2G2-4	27.3759	7.285	0.422404	8.91442	21.104	15.7929
	2G2-5	9	7.2388	1.21241	13.06	10.772	17.338	37.1247	0.46702	499.1	9	55.3			2G2-5	28.1821	7.27	0.755619	10.4312	13.8049	64.887	16.2478	3.99358	377.1	7.1	53.3			2G2-5	25.8728	7.77	1.2079	9.56487	7.91862	12.0784	37.0115	0.326342	146.8	9	16.3			2G2-5	26.7802	7.37	0.298829	8.04184	26.9111	12.338
	2G3-1	24.8	6.412	1.92734	22.7444	11.8009	46.8307	54.7237	0.855767	523.1	24.8	21.1			2G3-1	37.8889	6.37	1.15009	19.4875	16.9442	102.258	30.9423	3.30481	432.8	28.2	15.4			2G3-1	32.788	5.95	2.36695	31.7946	13.4327	66.8189	51.0437	1.30905	203.9	14.1	14.5			2G3-1	37.4549	6.37	2.13732	27.2133	12.7324	58.8307
	2G3-2	14.5	6.655	1.61826	17.5194	10.8261	36.6966	48.0124	0.764316	510.8	14.5	35.3			2G3-2	40.1674	6.54	0.446499	11.7367	26.2861	102.827	26.2954	3.91045	458.4	16.9	27.1			2G3-2	40.1873	6.27	1.98603	23.1388	11.6508	37.4581	49.7665	0.752676	302.1	15.9	19			2G3-2	30.7026	6.54	1.41693	18.6929	13.1926	21.6966
	2G3-3	12	6.754	1.45729	14.9483	10.2576	20.6227	48.1354	0.42843	507.2	12	42.4			2G3-3	43.3976	6.65	0.150157	8.32624	55.4502	90.9141	25.4674	3.56982	418.4	11.6	36.1			2G3-3	35.3311	6.59	1.72837	18.9592	10.9694	27.3369	47.3659	0.577143	164.8	9.1	18.2			2G3-3	31.4059	6.65	1.0092	14.5904	14.4574	16.6623
	2G3-4	13.9	6.94782	1.25049	10.6955	8.55307	19.3659	43.1547	0.448754	415.1	13.9	29.8			2G3-4	37.0282	6.9255	0.818993	10.939	13.3567	77.5426	25.2048	3.0765	360.6	8.9	40.6			2G3-4	30.4877	6.61	1.39071	13.1825	9.47901	22.1385	39.2048	0.564688	154.4	8.6	18			2G3-4	25.0787	6.955	0.529371	10.2275	19.3202	14.2637
	2G3-5	9.7	7.16472	1.35677	16.4142	12.098	16.8206	31.1105	0.540671	403	9.7	41.6			2G3-5	35.7825	7.195	1.06315	10.4142	9.79565	73.187	27.125	2.69814	369.5	6.9	53.5			2G3-5	25.7592	6.93	1.21	12.3	10.1653	19.3975	39.4857	0.491254	153.2	7.2	21.2			2G3-5	21.0542	7.095	0.769528	12.8999	16.7634	13.8206
[truncated: 18 more columns]

## Sheet: autours of the data
	Author list:
	1. Junyong Ma
	Email: mjy172404707@me.com.
	2. Hairong Han*
	Email: hanhr6015@bjfu.edu.cn
	3. Xiaoqin Cheng
	Email: cxq_200074@163.com
	All the authors from “Key laboratory of ministry of Forest Cultivation and Conservation of Ministry of Education, Beijing Forestry University, Beijing 100083, China”
	*Corresponding author: Hairong Han
	The detailed information of Corresponding author: Telephone number: 86 13910397778. Fax: +86 10 62336015. Email: hanhr6015@bjfu.edu.cn. Postal address: office 428, key laboratory of ministry of Forest Cultivation and Conservation of Ministry of Education, Forestry college, Beijing Forestry University, Beijing 100083, China
