# Supplementary material for: Soil temperatures and active carbon components as key drivers of C stock dynamics between two different stand ages of Larix principis-rupprechtii plantation
Source: PeerJ. 2020 Jan 21;8:e8384. doi: 10.7717/peerj.8384 (PMC6979437; doi:10.7717/peerj.8384)
Supplement: Supplemental Information 2 [file peerj-08-8384-s002.doc]

| **PLFA biomarkers for microbial group** | |
| --- | --- |
| **Microbial group** | **PLFA biomarkers** |
|
| **Bacteria** | 14:00 |
| 15:00 |
| 16:00 |
| 16:1w5c |
| 17:00 |
| 18:00 |
| 20:00 |
| **Gram-negative bacteria** | 14:1w5c |
| 15:1w6c |
| 16:1w7c |
| 16:1w7t |
| 16:1w5c |
| 16:1w9c |
| 17:1w8c |
| 18:1w9c |
| 18:1w7c |
| 18:1w7t |
| cy17:0 |
| cy19:0 |
| **Gram-positive bacterium** | i13:0 |
| a13:0 |
| i14:0 |
| i15:0 |
| a15:0 |
| i16:0 |
| i17:0 |
| a17:0 |
| **Fungi** | 10Me 18:0 |
| 10Me 16:0 |
| 10Me17:0 |
| 16Me16:0 |
| **Fungus** | 18:2w6c |
| 18:3w6c |
| 18:3w3c |
| 18:1w9c |
| **Protozoon** | 20:2w6 |
| 20:3w6 |
| 20:4w6 |
| **MethanogensI** | 16：1w8c |
| 16：1w6c |
| **Methanogens** | 18：1w8c |
| 18：1w8t |
| 18：1w6c |
| **Aerobic bacteria** | i15:0 |
| a15:0 |
| 15:00 |
| i16:0 |
| 16:1w9 |
| 16:1w7t |
| i17:0 |
| a17:0 |
| 17:00 |
| **Anaerobic bacteria** | 18:1w7c |
|  |  |
